# Supplementary material for: Coupled microbial bloom and oxygenation decline recorded by magnetofossils during the Palaeocene–Eocene Thermal Maximum
Source: PubMed Central journal article supplement (PMC6167317; doi:10.1038/s41467-018-06472-y), 2018-10-01
Supplement: 41467_2018_6472_MOESM1_ESM.pdf [file 41467_2018_6472_MOESM1_ESM.pdf]

1 **Coupled microbial bloom and oxygenation decline recorded by magnetofossils during**  
2 **the Palaeocene-Eocene Thermal Maximum**

3

4 Chang et al.

5

6 **Supplementary Information**

7 **Supplementary Table 1** Magnetic properties of analysed samples from ODP Site 1263

| ODP Hole | Section | Interval (cm) | Depth (mbsf) | Depth (mcd) | Bulk $M_s$ ( $\times 10^{-3}$ Am <sup>2</sup> kg <sup>-1</sup> ) | CFB Bulk $M_s$ ( $\times 10^{-3}$ Am <sup>2</sup> kg <sup>-1</sup> ) | Bulk $B_c$ (mT) | Bulk $B_{cr}$ (mT) | CFB HIRM ( $\times 10^{-4}$ Am <sup>2</sup> kg <sup>-1</sup> ) | S-ratio | CFB Biogenic IRM ( $\times 10^{-3}$ Am <sup>2</sup> kg <sup>-1</sup> ) | Biogenic $B_{cr}$ (mT) | Biogenic DP |
|----------|---------|---------------|--------------|-------------|------------------------------------------------------------------|----------------------------------------------------------------------|-----------------|--------------------|----------------------------------------------------------------|---------|------------------------------------------------------------------------|------------------------|-------------|
| 1263C    | 14H2A   | 8-9           | 283.98       | 334.29      | 0.156                                                            | 1.657                                                                | 29.3            | 77.0               | -                                                              | -       | -                                                                      | -                      | -           |
| 1263C    | 14H2A   | 30-31         | 284.20       | 334.51      | 0.130                                                            | 1.285                                                                | 30.8            | 77.8               | -                                                              | -       | -                                                                      | -                      | -           |
| 1263C    | 14H2A   | 50-51         | 284.40       | 334.71      | 0.537                                                            | 3.631                                                                | 25.4            | 70.9               | 1.613                                                          | 0.832   | 0.260                                                                  | 66.1                   | 0.180       |
| 1263C    | 14H2A   | 70-71         | 284.60       | 334.91      | 2.111                                                            | 8.688                                                                | 20.3            | 49.3               | 1.784                                                          | 0.896   | 0.937                                                                  | 55.6                   | 0.195       |
| 1263C    | 14H2A   | 89-90         | 284.79       | 335.10      | 4.092                                                            | 10.204                                                               | 20.0            | 46.3               | 1.572                                                          | 0.917   | 1.315                                                                  | 55.6                   | 0.210       |
| 1263C    | 14H2A   | 99-100*       | 284.89       | 335.20      | 4.900                                                            | 10.793                                                               | 19.6            | 45.0               | 1.560                                                          | 0.925   | 1.240                                                                  | 54.1                   | 0.210       |
| 1263C    | 14H2A   | 110-111       | 285.00       | 335.31      | 8.933                                                            | 17.179                                                               | 19.2            | 44.2               | 1.975                                                          | 0.938   | 2.287                                                                  | 56.4                   | 0.200       |
| 1263C    | 14H2A   | 120-121       | 285.10       | 335.41      | 15.150                                                           | 27.849                                                               | 18.5            | 41.8               | 2.514                                                          | 0.960   | 4.453                                                                  | 53.5                   | 0.216       |
| 1263C    | 14H2A   | 125-126       | 285.15       | 335.46      | 15.162                                                           | 26.930                                                               | 18.8            | 42.6               | 2.499                                                          | 0.959   | 4.240                                                                  | 53.8                   | 0.212       |
| 1263C    | 14H2A   | 130-131*      | 285.20       | 335.51      | 16.602                                                           | 24.308                                                               | 18.8            | 42.7               | 2.122                                                          | 0.960   | 3.930                                                                  | 54.3                   | 0.216       |
| 1263C    | 14H2A   | 134-135       | 285.24       | 335.55      | 14.637                                                           | 24.559                                                               | 19.2            | 43.2               | 2.136                                                          | 0.958   | 4.170                                                                  | 55.1                   | 0.215       |
| 1263C    | 14H2A   | 138-139       | 285.28       | 335.59      | 15.142                                                           | 23.623                                                               | 19.5            | 41.5               | 2.068                                                          | 0.959   | 4.047                                                                  | 53.5                   | 0.220       |
| 1263C    | 14H2A   | 142-143       | 285.32       | 335.63      | 15.154                                                           | 17.976                                                               | 20.1            | 41.0               | 1.781                                                          | 0.954   | 3.264                                                                  | 47.9                   | 0.222       |
| 1263C    | 14H2A   | 146-147*      | 285.36       | 335.67      | 15.043                                                           | 15.445                                                               | 19.5            | 41.0               | 1.469                                                          | 0.955   | 2.670                                                                  | 52.7                   | 0.228       |
| 1263C    | 14HCC   | 7-8           | 285.47       | 335.78      | 0.138                                                            | 1.104                                                                | 17.4            | 39.7               | -                                                              | -       | -                                                                      | -                      | -           |
| 1263C    | 14HCC   | 15-16         | 285.55       | 335.86      | 0.120                                                            | 1.044                                                                | 17.4            | 44.3               | -                                                              | -       | -                                                                      | -                      | -           |

8 \* Samples that were subjected to detailed transmission electron microscope (TEM) and scanning electron microscope (SEM) analyses,  
9 and micromagnetic simulation

10 - Magnetically weak samples with noisy IRM curves

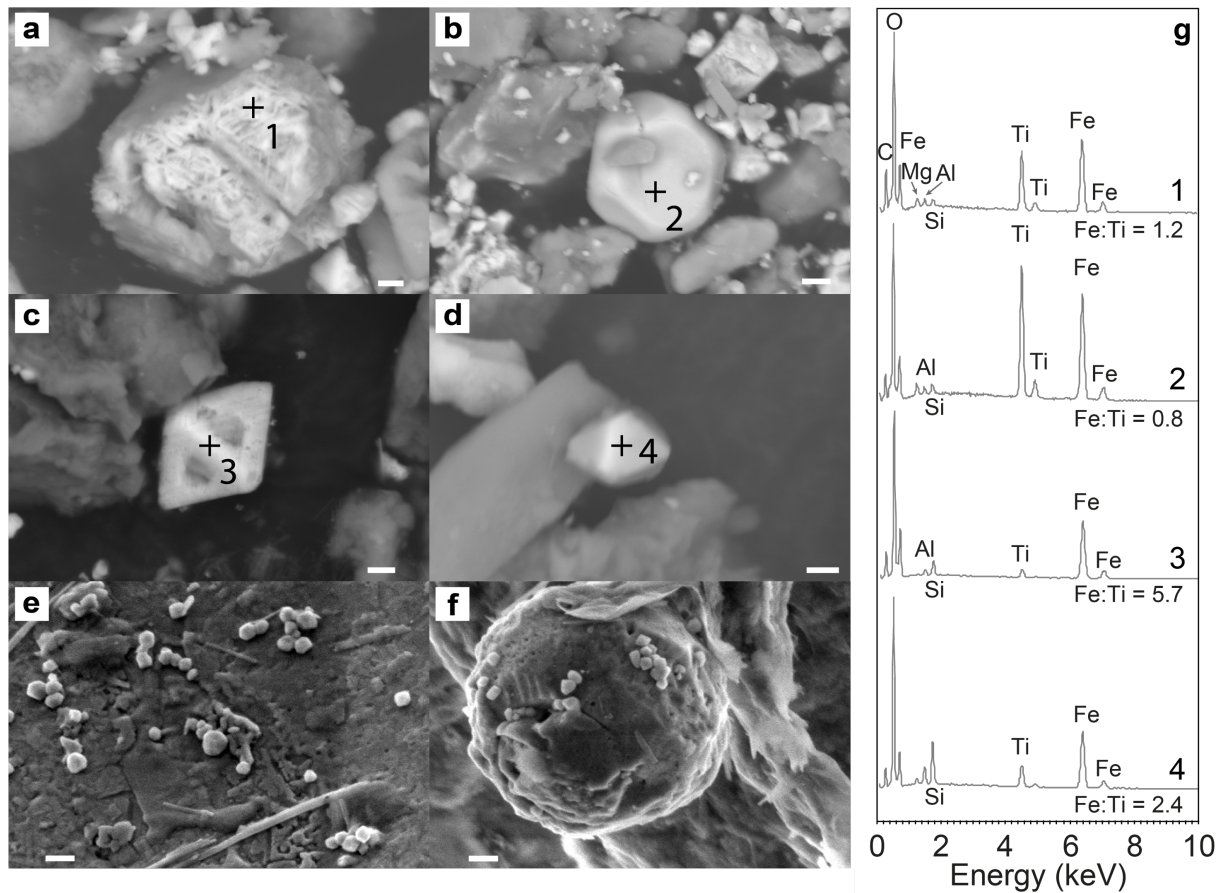

11

12 **Supplementary Figure 1 SEM observations on magnetic mineral extracts of samples**  
 13 **from ODP Site 1263.** (a-f) SEM images and (g) energy-dispersive spectra (EDS) spot analyses  
 14 of magnetic extracts from (a, b) the peak PETM (1263C-14-2H-110-112 cm) and (c-f) the  
 15 PETM onset (1263C-14-2H-146-147 cm) at Site 1263. Scale bars in (a, c, d), (b) and (e, f) are  
 16 1  $\mu\text{m}$ , 2  $\mu\text{m}$  and 100 nm, respectively. SEM observations with EDS analysis reveals the  
 17 presence of detrital Fe-Ti oxides (a-d) in addition to magnetofossils. Features associated with  
 18 magnetic mineral dissolution<sup>1,2</sup> are evident in SEM observations (a), which is consistent with  
 19 decreased oxygenation during PETM warming. We did not observe dissolution features  
 20 associated with magnetofossils, such as magnetofossils with intact lattice fringes and dissolved  
 21 internal sections, as has been observed previously<sup>3</sup>. High-resolution SEM images (e, f) further  
 22 confirm the presence of magnetofossils within the PETM samples, which also reveal the three-  
 23 dimensional shapes of magnetofossil crystals. Low-resolution SEM images (a-d) were taken at  
 24 15 kV with a sample stage of  $\sim$ 10-11 mm. High-resolution SEM images (e, f) were taken at 2  
 25 kV with a sample stage of 3.4 mm.

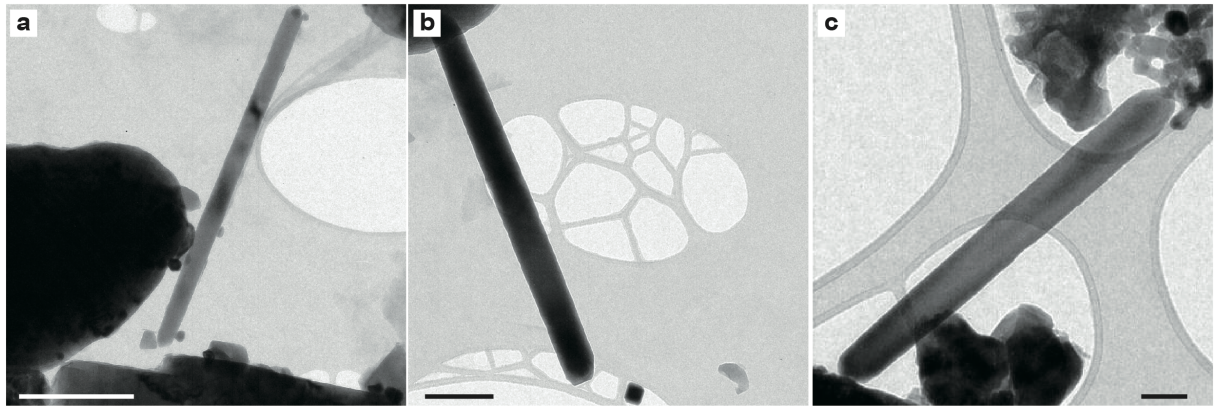

26

27 **Supplementary Figure 2** TEM images of needle-shaped giant magnetofossils from the  
28 **peak PETM at Site 1263** (1263C-14-2H-110-112 cm). Scale bars in (a), (b) and (c) are 500  
29 nm, 200 nm, and 100 nm, respectively. TEM observations indicate the presence of giant  
30 needle-like magnetofossils<sup>4,5</sup> within the sample from the PETM peak. Magnetite needles were  
31 not observed within samples from the PETM onset and rising.

32

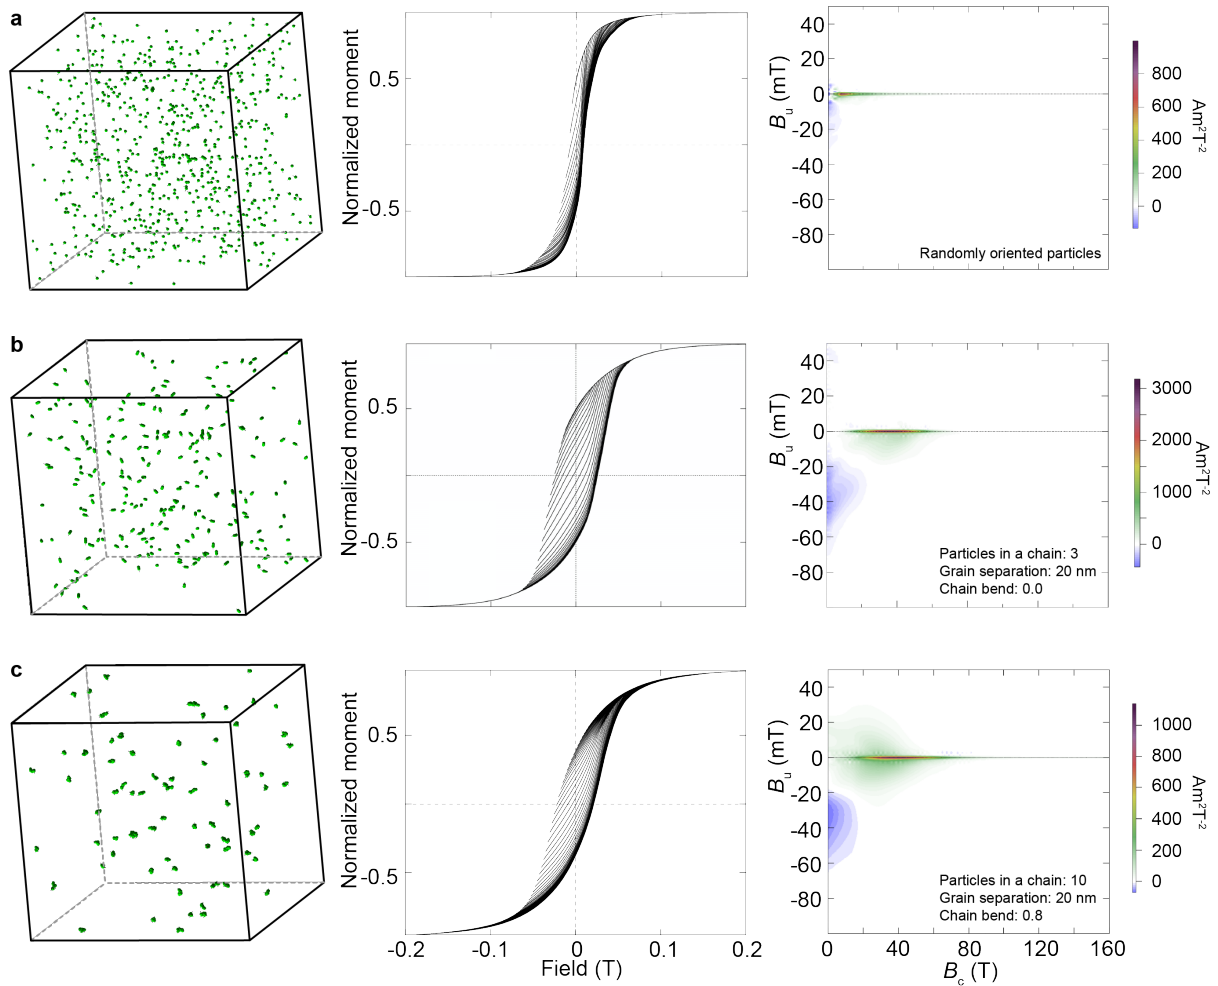

34

### 35 **Supplementary Figure 3** Micromagnetic simulation of FORC diagrams for the PETM

36 **peak sample.** The magnetofossil size distribution in the initial model (left) was constructed  
 37 using TEM data from Figures 4f, i, l. Different magnetosome chain configurations (left), e.g.,  
 38 (a) randomly oriented, (b) 3 crystals and (c) 10 crystals in a chain, and different chain bending,  
 39 were modelled. Other modelling parameters: 100 FORCs with  $B_c = 160$  mT,  $B_u = 60$  mT, and  
 40 averaging of 100 identical FORC simulations. Simulated FORCs (middle) were processed  
 41 using FORCinel<sup>6</sup> with VARIFORC smoothing parameters<sup>7</sup>:  $\{s_{c0}, s_{c1}, s_{b0}, s_{b1}, \lambda_c, \lambda_b\} = \{7, 7, 2,$   
 42  $7, 0.1, 0.1\}$ . Processed FORC diagrams are shown on the right. Modelling results indicate large  
 43 variations in magnetic properties when different magnetic mineral microstructures are  
 44 considered.

45 **Supplementary References**

- 46 1. Nowaczyk, N. R. Dissolution of titanomagnetite and sulphidization in sediments from  
47 Lake Kinneret, Israel. *Geophys. J. Int.* **187**, 34–44 (2011).
- 48 2. Roberts, A. P. Magnetic mineral diagenesis. *Earth-Sci. Rev.* **151**, 1–47 (2015).
- 49 3. Vali H. & Kirschvink, J. L. Magnetofossil dissolution in a paleomagnetically unstable  
50 deep-sea sediment. *Nature* **339**, 203–206 (1989).
- 51 4. Schumann, D., Raub, T. D., Kopp, R. E., Guerquin-Kerne, J. L., Wue, T. D., Rouiller, I.,  
52 Smirnov, A. V., Kelly Sears, S., Lücken, U., Tikoo, S. M., Hesse, R., Kirschvink, J. L. &  
53 Vali, H. Gigantism in unique biogenic magnetite at the Paleocene–Eocene Thermal  
54 Maximum. *Proc. Natl. Acad. Sci. USA* **105**, 17648–17653 (2008).
- 55 5. Chang, L., Roberts, A. P., Williams, W., Fitz Gerald, J. D., Larrasoaña, J. C., Jovane, L.  
56 & Muxworthy, A. R. Giant magnetofossils and hyperthermal events. *Earth Planet. Sci.*  
57 *Lett.* **351–352**, 258–269 (2012).
- 58 6. Harrison, R. J. & Feinberg, J. M. FORCinel: an improved algorithm for calculating first-  
59 order reversal curve distributions using locally weighted regression smoothing.  
60 *Geochem. Geophys. Geosyst.* **9**, Q05016, doi:10.1029/2008GC001987 (2008).
- 61 7. Egli, R. VARIFORC: an optimized protocol for calculating non-regular first-order  
62 reversal curve (FORC) diagrams. *Global Planet. Change* **110**, 302–320 (2013).
